# Supplementary material for: Molecular mechanisms underlying menthol binding and activation of TRPM8 ion channel
Source: PubMed Central journal article supplement (PMC7391767; doi:10.1038/s41467-020-17582-x), 2020-07-29
Supplement: 41467_2020_17582_MOESM1_ESM.pdf [file 41467_2020_17582_MOESM1_ESM.pdf]

## **Molecular mechanisms underlying menthol binding and activation of TRPM8 ion channel**

Lizhen Xu<sup>1#</sup>, Yalan Han<sup>2,3#</sup>, Xiaoying Chen<sup>1</sup>, Aerziguli Aierken<sup>1</sup>, Han Wen<sup>4</sup>, Wenjun Zheng<sup>4</sup>, Hongkun Wang<sup>5,6</sup>, Xiancui Lu<sup>2,3</sup>, Zhenye Zhao<sup>1</sup>, Cheng Ma<sup>7</sup>, Ping Liang<sup>5,6</sup>, Wei Yang<sup>8\*</sup>, Shilong Yang<sup>9\*</sup> and Fan Yang<sup>1\*</sup>

<sup>1</sup>Department of Biophysics, and Kidney Disease Center of the First Affiliated Hospital, Zhejiang University School of Medicine, Hangzhou 310058, Zhejiang Province, China.

<sup>2</sup>Key Laboratory of Animal Models and Human Disease Mechanisms of Chinese Academy of Sciences/Key Laboratory of bioactive peptides of Yunnan Province, Kunming Institute of Zoology, Kunming 650223, Yunnan, China.

<sup>3</sup>University of Chinese Academy of Sciences, Beijing, China

<sup>4</sup>Department of Physics, State University of New York at Buffalo, Buffalo, New York, U.S.A.

<sup>5</sup>Key Laboratory of Combined Multi-organ Transplantation, Ministry of Public Health, The First Affiliated Hospital, Zhejiang University School of Medicine

<sup>6</sup>Institute of Translational Medicine, Zhejiang University

<sup>7</sup>Protein facility, School of Medicine, Zhejiang University

<sup>8</sup>Department of Biophysics, and Department of Neurosurgery of the First Affiliated Hospital, Zhejiang University School of Medicine, Hangzhou 310058, Zhejiang Province, China

<sup>9</sup>College of Wildlife and Protected Area, Northeast Forestry University, Harbin 150040, China

#These authors contributed equally: Lizhen Xu and Yalan Han

Correspondence and requests for materials should be addressed to W.Y. (email: yangwei@zju.edu.cn) or to S.-L.Y. (email: syang2020@nefu.edu.cn) or to F.Y. (email: fanyanga@zju.edu.cn)

## Supplementary Figures

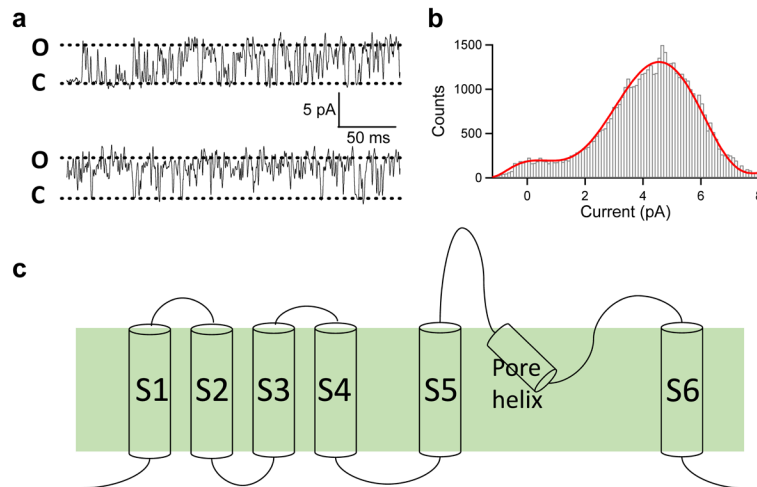

**Supplementary Figure 1. Single-channel recording of menthol activation of TRPM8 channel.** (a) Representative single-channel current traces of TRPM8 channel in response to 500  $\mu\text{M}$  menthol recorded in the inside-out configuration. (b) All-point histogram of the representative single-channel traces. The histogram was fitted to a double gauss function (line in red). (c) A diagram illustrating the topology of TRPM8 transmembrane domains.

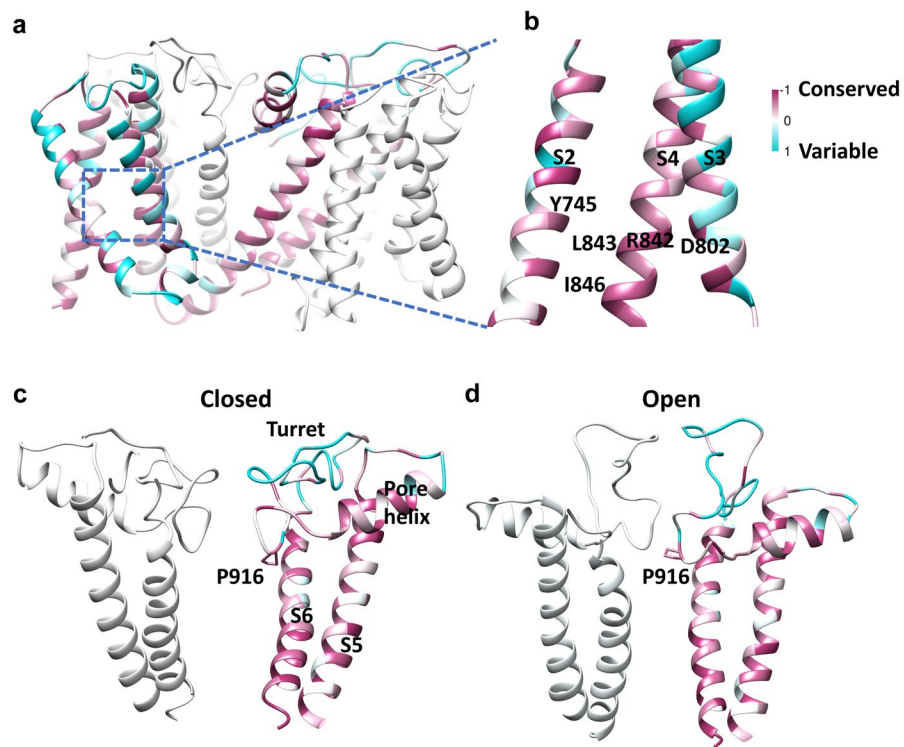

**Supplementary Figure 2. ConSurf analysis of TRPM8 sequence conservation.** (a) One subunit of TRPM8 was colored based on the protein sequence conservation score calculated by the ConSurf server. Residues in maroon and cyan are evolutionarily conserved or variable, respectively. (b) Zoom-in view of the ligand binding pocket formed in the S1-S4 domain. Residues highly conserved are also critical for menthol binding. (c and d) Residue conservation scores were mapped to the pore region in the closed (c) and potential open (d) state models.

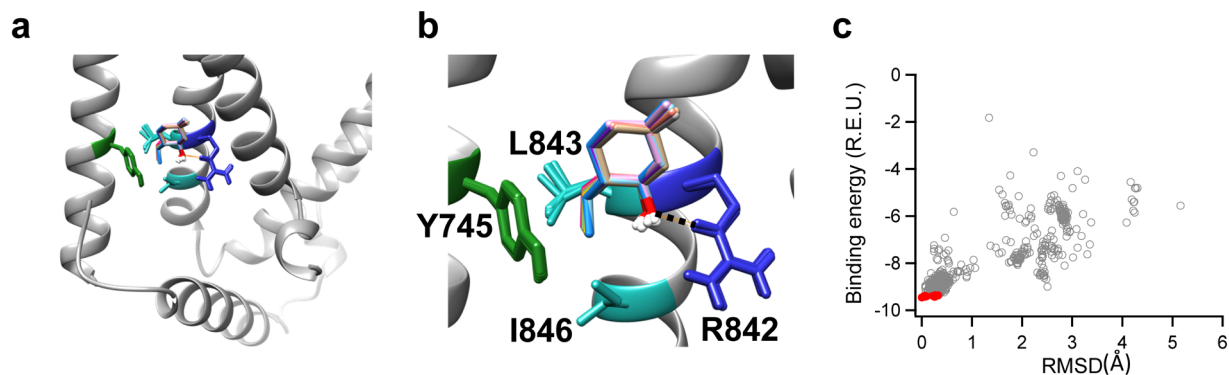

**Supplementary Figure 3. Docking of menthol molecule into the potential open state model.** (a) The top 10 docking model with lowest binding energy. R842, Y745 and L843 and I846 were colored in blue, green and cyan, respectively. (b) The zoom in view of the menthol binding configuration. A hydrogen bond is formed between the hydroxyl group of menthol and R842 (dashed line in black). (c) The docking models exhibited a funnel-shaped distribution of binding energy calculated by Rosetta (R.E.U., Rosetta energy unit). The top 10 models with lowest binding energy were colored in red.

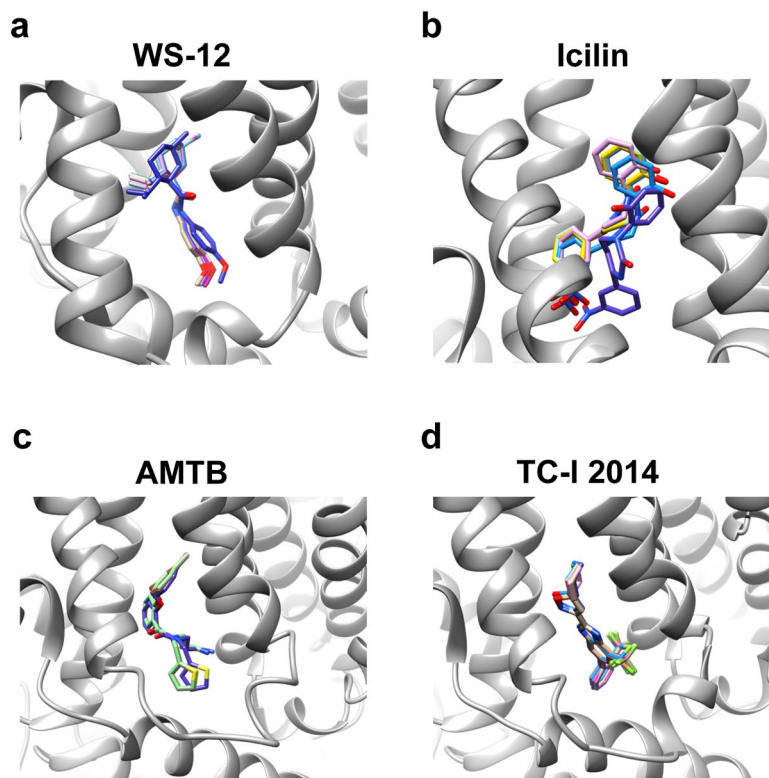

**Supplementary Figure 4. Docking of ligands into TRPM8.** (a to d) The top 10 docking model of WS-12, icilin, AMTB and TC-I 2014 with lowest binding energy into the corresponding structural states of TRPM8 (PDB ID: 6NR2, 6NR3, 6O6R and 6O72, respectively).

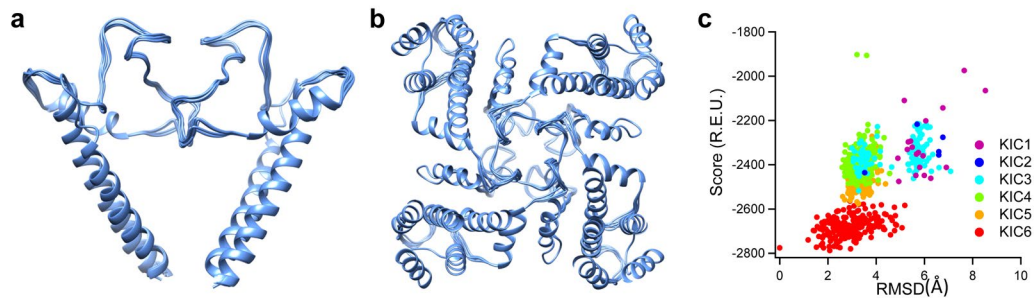

**Supplementary Figure 5. Modeling of TRPM8 in the menthol-induced open state.** (a and b) The side (a) and bottom (b) view of top 10 models with lowest energy after six rounds of KIC loop modeling. These models were well converged. (c) The potential models of the open state exhibited a funnel-shaped distribution of total energy after six rounds of KIC loop modeling as calculated by Rosetta (R.E.U., Rosetta energy unit).

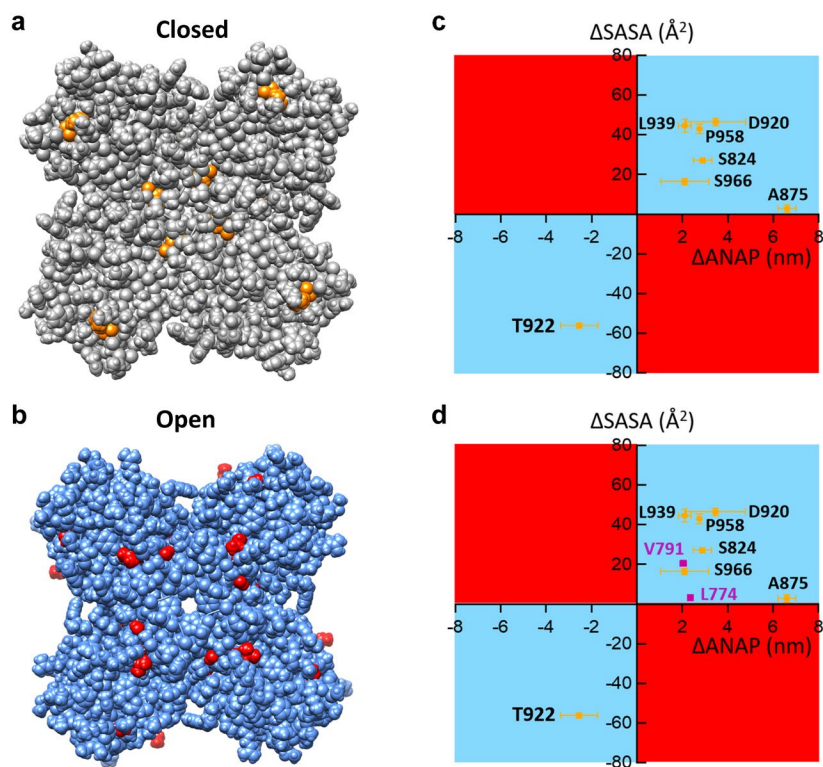

**Supplementary Figure 6. Shifts in ANAP emission positively correlated with changes in SASA.** (a and b) The top view of TRPM8 models in the closed (a) and open (b) states. All atoms in residues were showed in a sphere mode. The residues showing a shift in ANAP emission upon menthol activation were labeled in orange in the closed state (a) and in red in the open state (b), respectively. (c and d) Positive correlation between shifts in ANAP emission peak (y axis) and changes in SASA measured from our closed and open state models (x axis);  $n = 4-6$ . ANAP shifts measured from L774 and V791 were not used in modeling building. Their ANAP shifts were also in agreement with changes in SASA predicted from our models (d, data points in purple). All statistical data are given as mean  $\pm$  s.e.m.

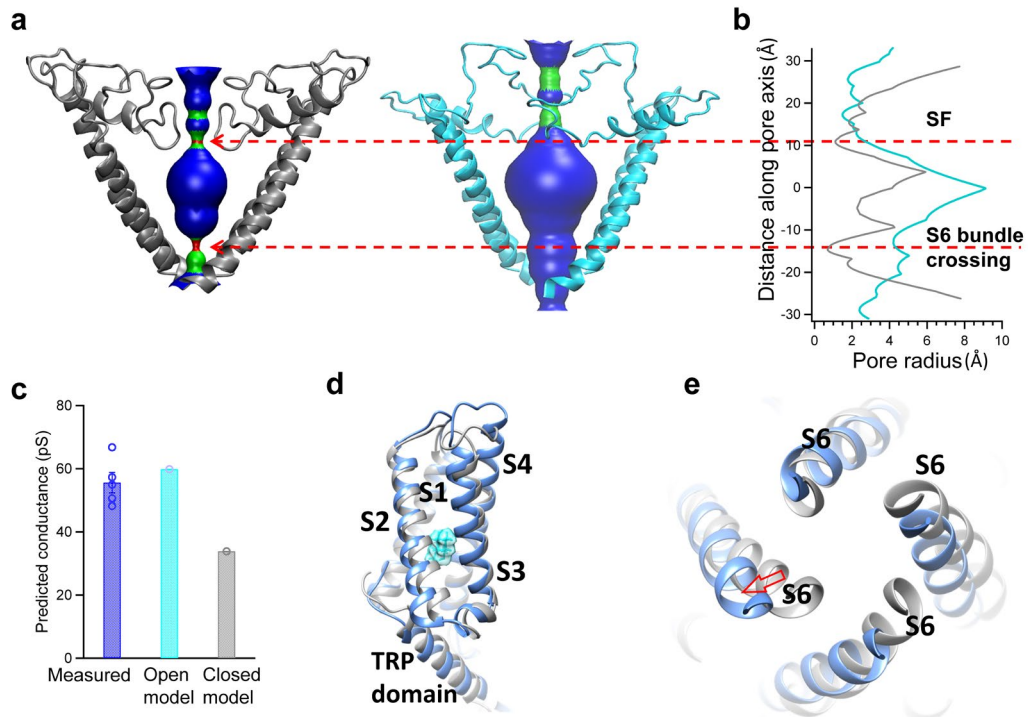

**Supplementary Figure 7. A potential model of menthol-induced open state channel.**

**(a and b)** Distribution of pore radii in our models of TRPM8 channel in the closed (grey) and potential open (cyan) state, respectively. In our model of the open state, both the selectivity filter region and the S6 bundle crossing are wide enough for water molecules and ions to permeate. **(c)** Conductance of TRPM8 in different states predicted by the HOLE program. Both our experimentally measured conductance ( $55.5 \pm 3.2$  pS,  $n=5$ ; also see in **Fig. S1**) and predicted conductance for the open state model were much larger than the predicted conductance for the closed state model. **(d and e)** Menthol-induced conformational rearrangements as suggested by comparing TRPM8 structural models in the closed (grey) and open (cyan) state. All statistical data are given as mean  $\pm$  s.e.m.



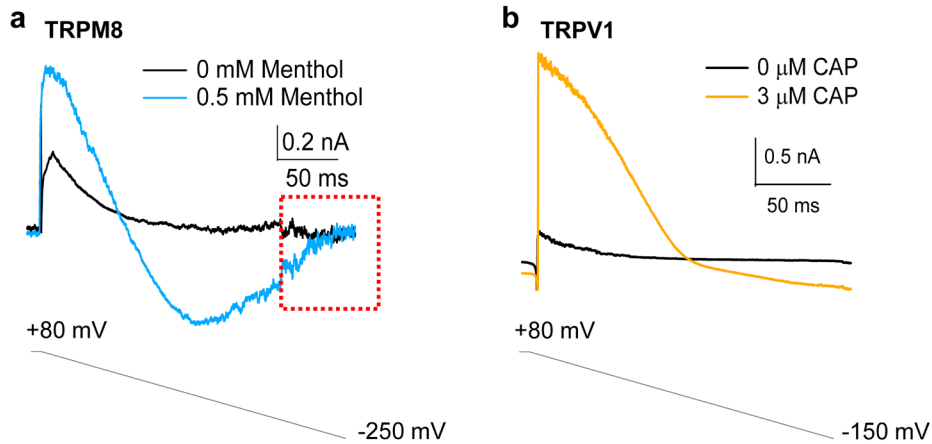

**Supplementary Figure 8. Deep hyperpolarization antagonized menthol activation of TRPM8 but not capsaicin activation of TRPV1.**

(a) Representative whole-cell patch-clamp recording of menthol activation of TRPM8 in response to a voltage ramp. In the hyperpolarized voltage range, TRPM8 current increased first and then decreased towards the baseline. Such a hook-shaped current indicated that at deep hyperpolarized voltage the open probability was decreased towards zero even in the presence of 0.5 mM menthol. (b) Representative whole-cell patch-clamp recording of capsaicin activation of TRPV1 in response to a voltage ramp. In the hyperpolarized voltage range, TRPV1 current kept increasing linearly with the lowering of membrane potential, which indicated that the channel open probability stayed at a constant level.

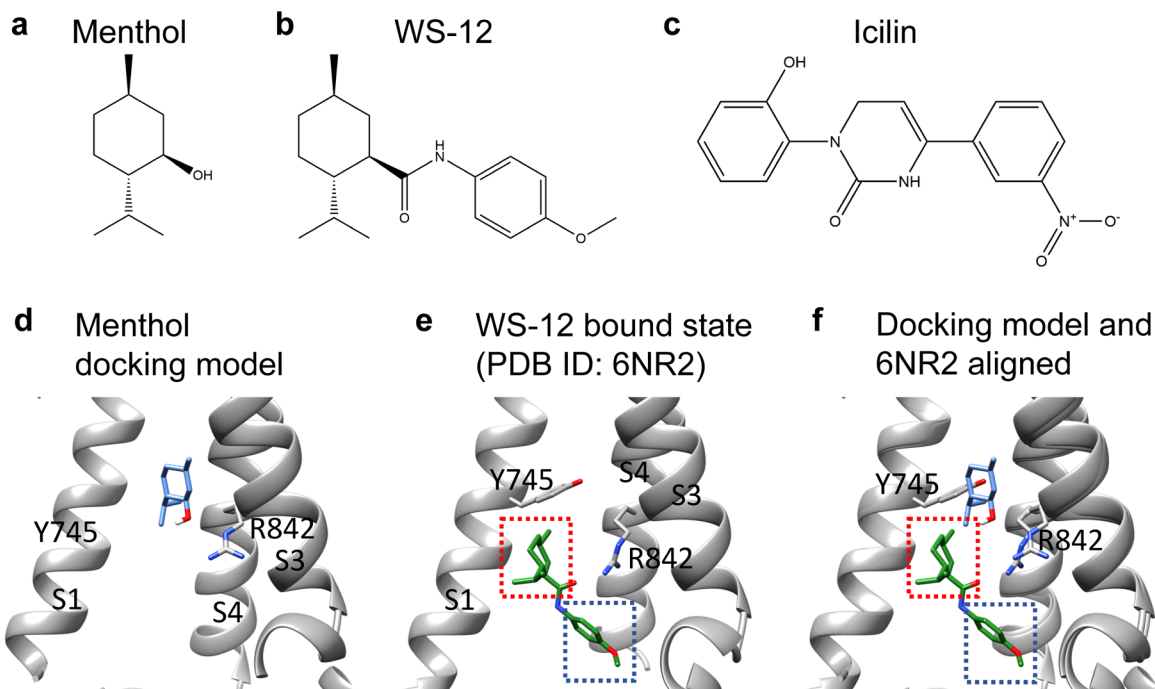

**Supplementary Figure 9. Comparison of TRPM8 agonists and their binding configurations.** (a to c) Chemical structures of menthol (a), WS-12 (b) and icilin (c), respectively. (d) Our menthol docking model. (e) cryo-EM structure of the S1-S4 domain with WS-12 bound. The menthol-like moiety and benzene ring like moiety of WS-12 were highlighted by dashed boxes in red and blue, respectively. (f) Comparison of our menthol docking model and WS-12 bound state cryo-EM structure. The menthol-like moiety and benzene ring like moiety of WS-12 were highlighted by dashed boxes in red and blue, respectively.

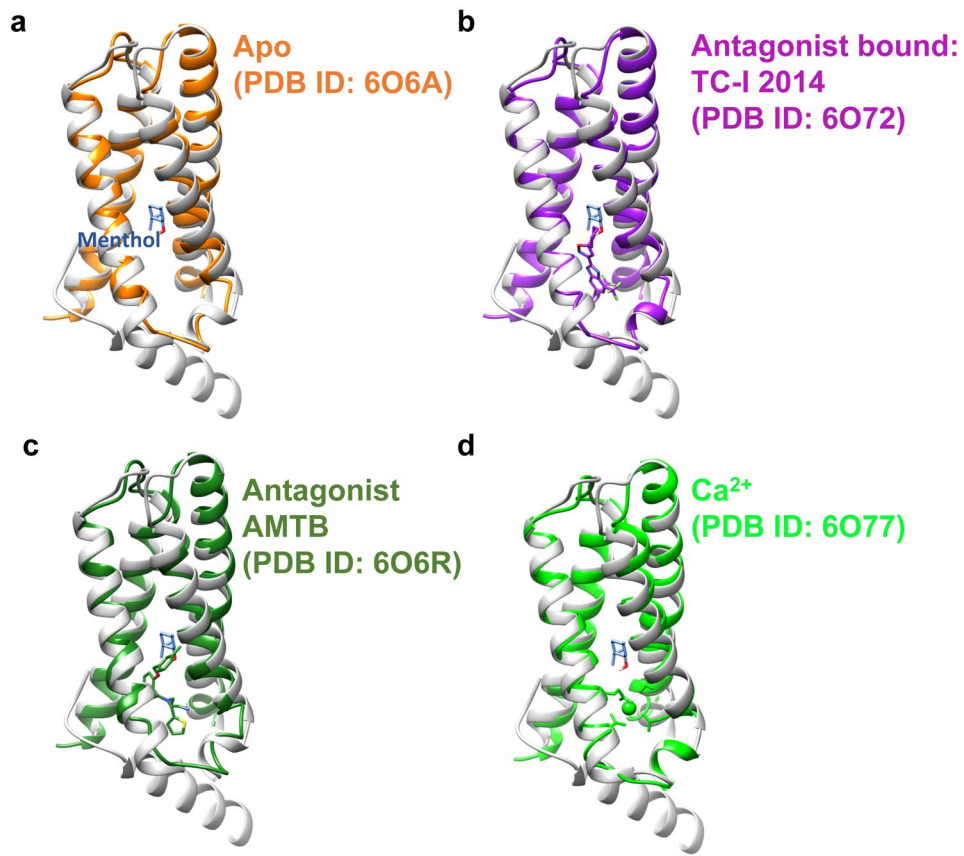

**Supplementary Figure 10. Comparison of the S1-S4 domain in menthol docking model with parrot TRPM8 ligand bound states. Menthol docking model was colored in grey.**

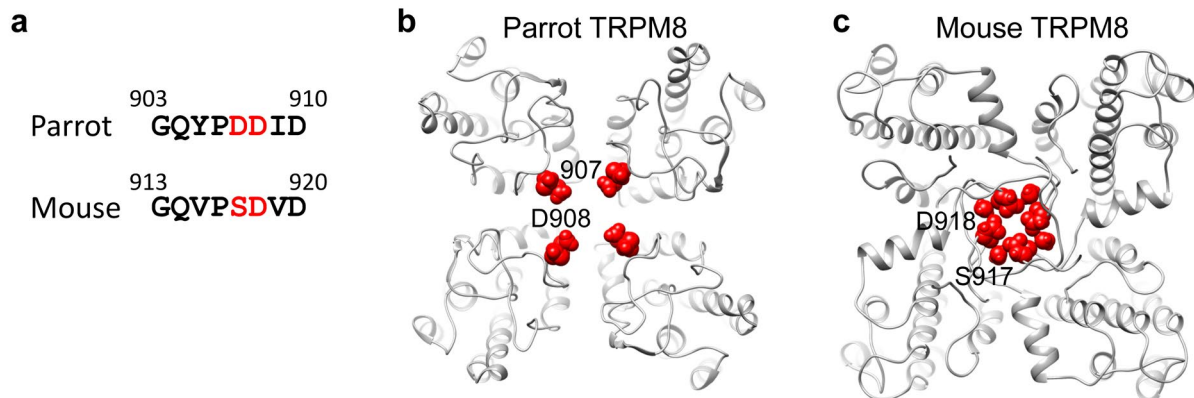

**Supplementary Figure 11. Comparison of the selectivity filter in parrot and mouse TRPM8.** (a) Amino acid sequence alignment of the selectivity filter in TRPM8 channels. (b and c) Top view of the parrot TRPM8 in the desensitized state (PDB ID: 6O77) and our model of menthol activated state of mouse TRPM8. Residues toward the ion permeation pathway were highlighted in red.

## Supplementary Tables

**Supplementary Table 1.** ANAP-incorporated TRPM8 mutants. The function of these ANAP-incorporated mutants was accessed by patch-clamp recordings. Menthol (1 mM) was perfused to activate a mutant channel.

| <b>Mutant</b> | <b>Position</b> | <b>Menthol activation</b> |
|---------------|-----------------|---------------------------|
| P734ANAP      | S1              | YES                       |
| N741ANAP      | S1              | NO                        |
| L756ANAP      | S1              | NO                        |
| D759ANAP      | S1S2 linker     | NO                        |
| H761ANAP      | S1S2 linker     | NO                        |
| P764ANAP      | S1S2 linker     | NO                        |
| L774ANAP      | S2              | YES                       |
| Y787ANAP      | S2              | YES                       |
| N789ANAP      | S2S3 linker     | YES                       |
| V791ANAP      | S2S3 linker     | YES                       |
| T795ANAP      | S2S3 linker     | YES                       |
| Y808ANAP      | S3              | YES                       |
| L817ANAP      | S3              | YES                       |
| S819ANAP      | S3-S4 linker    | YES                       |
| S820ANAP      | S3-S4 linker    | YES                       |
| N821ANAP      | S3-S4 linker    | YES                       |
| K822ANAP      | S3-S4 linker    | NO                        |
| S823ANAP      | S3-S4 linker    | YES                       |
| S824ANAP      | S4              | YES                       |
| N852ANAP      | S4              | YES                       |
| L860ANAP      | S5              | NO                        |
| L864ANAP      | S5              | YES                       |
| I865ANAP      | S5              | NO                        |
| F870ANAP      | S5              | NO                        |
| F872ANAP      | S5              | NO                        |
| L873ANAP      | S5              | NO                        |
| F874ANAP      | S5              | NO                        |
| A875ANAP      | S5              | YES                       |
| V876ANAP      | S5              | YES                       |
| W877ANAP      | S5              | NO                        |
| M878ANAP      | S5              | NO                        |

|          |                   |     |
|----------|-------------------|-----|
| V879ANAP | S5                | NO  |
| A880ANA  | S5                | NO  |
| F881ANAP | S5                | NO  |
| G882ANAP | S5                | NO  |
| V883ANAP | S5                | NO  |
| A884ANAP | S5                | NO  |
| R885ANAP | S5                | NO  |
| Q886ANAP | S5                | NO  |
| G887ANAP | S5                | NO  |
| Q894ANAP | Between S5 and S6 | NO  |
| D920ANAP | Between S5 and S6 | YES |
| S921ANAP | Between S5 and S6 | YES |
| S932ANAP | Between S5 and S6 | NO  |
| L939ANAP | Between S5 and S6 | YES |
| D944ANAP | Between S5 and S6 | NO  |
| N947ANAP | Between S5 and S6 | YES |
| P952ANAP | Between S5 and S6 | YES |
| W954ANAP | Between S5 and S6 | YES |
| I955ANAP | Between S5 and S6 | NO  |
| T956ANAP | Between S5 and S6 | NO  |
| I957ANAP | Between S5 and S6 | NO  |
| P958ANAP | Between S5 and S6 | YES |
| L959ANAP | S6                | NO  |
| V960ANAP | S6                | NO  |
| C961ANAP | S6                | NO  |
| I962ANAP | S6                | YES |
| Y963ANAP | S6                | NO  |
| M964ANAP | S6                | NO  |
| L965ANAP | S6                | NO  |
| S966ANAP | S6                | YES |
| T967ANAP | S6                | NO  |
| N968ANAP | S6                | NO  |
| I969ANAP | S6                | NO  |
| Q992ANAP | TRP domain        | NO  |
| W994ANAP | TRP domain        | NO  |
| K995ANAP | TRP domain        | NO  |

|           |            |     |
|-----------|------------|-----|
| Q997ANAP  | TRP domain | NO  |
| R998ANAP  | TRP domain | NO  |
| Y999ANAP  | TRP domain | YES |
| Q1003ANAP | TRP domain | YES |
| E1004ANAP | TRP domain | NO  |
| C1006ANAP | TRP domain | YES |

**Supplementary Table 2. Primers used in this study to generate point mutations.**

| Name         | Primer-Forward                             | Primer-Reverse                              |
|--------------|--------------------------------------------|---------------------------------------------|
| Y745F        | CGTGGTCTTCTTCATCGCCTTCCTCCTGCT<br>GTTTGCCT | GGAAGGCGATGAAGAAGACCACGTTCCA<br>GGAGAAGACC  |
| Y745H        | CGTGGTCTTCCACATCGCCTTCCTCCTGCT<br>GTTTGCCT | GGAAGGCGATGTGGAAGACCACGTTCCA<br>GGAGAAGACC  |
| Y745W        | CGTGGTCTTCTGGATCGCCTTCCTCCTGC<br>TGTTTGCCT | GGAAGGCGATCCAGAAGACCACGTTCCA<br>GGAGAAGACC  |
| D802L        | GAACGTTATGTAAACCCTGGGACTCTTCT<br>ACTTCATAG | GTCCCAGGGTTAACATAACGTTCCATAGG<br>TCGGTGAAA  |
| D802S        | GAACGTTATGTCCACCCTGGGACTCTTCT<br>ACTTCATAG | GTCCCAGGGTGGACATAACGTTCCATAGG<br>TCGGTGAAA  |
| D802I        | GAACGTTATGATCACCTGGGACTCTTCT<br>ACTTCATAG  | GTCCCAGGGTGATCATAACGTTCCATAGG<br>TCGGTGAAA  |
| Y1005F       | GGTGCAGGAGGCCTGCAACCGCCTAAC<br>ATCCCCTTC   | GGCGTTGCAGGCCTCCTGCACCAGGAA<br>GTACCGCTGG   |
| R842K        | ATTCACGCTAAAGCTCATCCACATTTTCA<br>CCGTCAGCA | TGTGGATGAGCTTTAGCGTGAATATAATG<br>TAATCCAGA  |
| L843A        | CACGCTAAGGGCCATCCACATTTTCACCG<br>TCAGCAGGA | AAATGTGGATGGCCCTTAGCGTGAATATA<br>ATGTAATCC  |
| V775A        | CTACGCCCTGGCCTTCGTCTTCTGTG<br>ATGAAGTGA    | AGAGGACGAAGGCCAGGGCGTAGAGGA<br>TCAGCTCGGGG  |
| L843I        | CACGCTAAGGATCATCCACATTTTCACCG<br>TCAGCAGGA | AAATGTGGATGATCCTTAGCGTGAATATA<br>ATGTAATCC  |
| L843V        | CACGCTAAGGGTCATCCACATTTTCACCG<br>TCAGCAGGA | AAATGTGGATGACCCTTAGCGTGAATATA<br>ATGTAATCC  |
| L846V        | GCTCATCCACGTTTTACCGTCAGCAGGA<br>ACTTGGGAC  | TGACGGTGAAAACGTGGATGAGCCTTAG<br>CGTGAATATA  |
| F839A        | TTACATTATAGCCACGCTAAGGCTCATCC<br>ACATTTTCA | GCCTTAGCGTGGCTATAATGTAATCCAGA<br>CAGAAAATG  |
| L797A        | TTTACCCGACGCATGGAACGTTATGGAC<br>ACCCTGGGAC | TAACGTTCCATGCGTCCGGTGAAATAATTC<br>ACTCCGTTT |
| W798A        | CACCGACCTAGCGAACGTTATGGACACC<br>CTGGGACTCT | CCATAACGTTGCTAGGTCGGTGAAATAA<br>TTCCTCCG    |
| S819AN<br>AP | TCGGTTGCACTAGAGCGACGAGTCCTCCT<br>GGTACAGCG | ACTCGTCGCTCTAGTGCAACCGAAACACG<br>ATGCCGGCG  |
| S820AN<br>AP | GTTGCACTCCTAGGACGAGTCCTCCTGGT<br>ACAGCGGGA | AGGACTCGTCCTAGGAGTGCAACCGAAA<br>CACGATGCCG  |
| D821AN<br>AP | GCACTCCAGCTAGGAGTCCTCCTGGTACA<br>GCGGGAGGG | AGGAGGACTCCTAGCTGGAGTGCAACCG<br>AAACACGATG  |
| E822AN<br>AP | CTCCAGCGACTAGTCCTCCTGGTACAGCG<br>GGAGGGTCA | ACCAGGAGGACTAGTCGCTGGAGTGCAA<br>CCGAAACACG  |



|              |                                             |                                              |
|--------------|---------------------------------------------|----------------------------------------------|
| S823AN<br>AP | CAGCGACGAGTAGTCTGGTACAGCGGG<br>AGGGTCATTT   | TGTACCAGGACTACTCGTCGCTGGAGTGC<br>AACCGAAAC   |
| S824AN<br>AP | CGACGAGTCCTAGTGGTACAGCGGGAG<br>GGTCATTTTCT  | CGCTGTACCACTAGGACTCGTCGCTGGAG<br>TGCAACCGA   |
| N852AN<br>AP | AGTGTCTAGGTAGCTCGGGCCTAAGATT<br>ATCATGCTCC  | TAGGCCCGAGCTACCTAGACACTGTGAAG<br>ATGTGAATC   |
| L860AN<br>AP | GATTATCATGTAGCAGAGGATGATGATT<br>GACGTCTTCT  | TCATCCTCTGCTACATGATAATCTTAGGCC<br>CGAGGTTCT  |
| M864AN<br>AP | CCAGAGGATGTAGATTGACGTCTTCTTCT<br>TTTTGTTTT  | AGACGTCAATCTACATCCTCTGGAGCATG<br>ATAATCTTA   |
| I865ANA<br>P | GAGGATGATGTAGGACGTCTTCTTCTTTT<br>TGTTTTTGT  | AGAAGACGTCTACATCATCCTCTGGAGC<br>ATGATAATC    |
| F870AN<br>AP | CGTCTTCTTCTAGTTGTTTTGTTCCGCGT<br>GTGGATGG   | ACAAAAACAACACTAGAAGAAGACGTCAAT<br>CATCATCCTC |
| F872AN<br>AP | CTTCTTTTTGTAGTTGTTCCGCGTGTGGAT<br>GGTGGCCT  | CGGCGAACAACTACAAAAGAAGAAGAC<br>GTCAATCATC    |
| L873AN<br>AP | CTTTTTGTTTTAGTTCGCCGTGTGGATGG<br>TGGCCTTG   | ACACGGCGAACTAAAACAAAAGAAGAA<br>GACGTCAATC    |
| F874AN<br>AP | TTTGTTTTGTAGGCCGTGTGGATGGTGG<br>CCTTTGGGG   | TCCACACGGCCTACAAAACAAAAGAA<br>GAAGACGTCA     |
| A875AN<br>AP | GTTTTTGTCTAGGTGTGGATGGTGGCCT<br>TTGGGGTGG   | CCATCCACACCTAGAACAAAACAAAAG<br>AAGAAGACG     |
| V876AN<br>AP | TTTGTTGCCTAGTGGATGGTGGCCTTTG<br>GGGTGGCCC   | CCACCATCCACTAGGCGAACAAAACAAA<br>AAGAAGAAG    |
| W877AN<br>AP | GTTCCGCGTGTAGATGGTGGCCTTTGGG<br>GTGGCCCCGGC | AGGCCACCATCTACACGGCGAACAAAAC<br>AAAAGAAG     |
| M878AN<br>AP | CGCCGTGTGGTAGGTGGCCTTTGGGGTG<br>GCCCGGCAGG  | CAAAGGCCACCTACCACACGGCGAACAA<br>AAACAAAAG    |
| V879AN<br>AP | CGTGTGGATGTAGGCCTTTGGGGTGGCC<br>CGGCAGGGCA  | TGCCCTGCCGGGCCACCCCAAAGGCCTAC<br>ATCCACACG   |
| A880AN<br>AP | GTGGATGGTGTAGTTTGGGGTGGCCCCG<br>CAGGGCATCC  | CCACCCCAAACCTACACCATCCACACGGCG<br>AACAAAAC   |
| F881AN<br>AP | GATGGTGGCCTAGGGGGTGGCCCGGCA<br>GGGCATCCTGA  | GGGCCACCCCTAGGCCACCATCCACACG<br>GCGAACAAA    |
| G882AN<br>AP | GGTGGCCTTTTAGGTGGCCCGGCAGGGC<br>ATCCTGAGGA  | GCCGGGCCACCTAAAAGGCCACCATCCAC<br>ACGGCGAAC   |
| V883AN<br>AP | GGCCTTTGGGTAGGCCCGGCAGGGCATC<br>CTGAGGAAGA  | CCTGCCGGGCCTACCCAAAGGCCACCATC<br>CACACGGCG   |
| A884AN<br>AP | CTTTGGGGTGTAGCGGCAGGGCATCCTG<br>AGGAAGAACG  | TGCCCTGCCGCTACACCCCAAAGGCCACC<br>ATCCACACG   |
| R885AN<br>AP | TGGGGTGGCCTAGCAGGGCATCCTGAGG<br>AAGAACGAGC  | GGATGCCCTGCTAGGCCACCCCAAAGGCC<br>ACCATCCAC   |

|              |                                             |                                              |
|--------------|---------------------------------------------|----------------------------------------------|
| Q886AN<br>AP | GGTGGCCCCGGTAGGGCATCCTGAGGAA<br>GAACGAGCATA | TCAGGATGCCCTACCGGGCCACCCCAAAG<br>GCCACCATC   |
| G887AN<br>AP | GGCCCCGGCAGTAGATCCTGAGGAAGAAC<br>GAGCATAGAT | TCCTCAGGATCTACTGCCGGGCCACCCCA<br>AAGGCCACC   |
| H894AN<br>AP | GAAGAACGAGTAGAGATGGGAGTGGAT<br>TTTTAGATCCG  | ACTCCCATCTCTACTCGTTCTTCCTCAGGA<br>TGCCCTGC   |
| D920AN<br>AP | AGATGATGTGTAGGGGACAACATATAAC<br>TTTGATAGGT  | ATGTTGTCCCCTACACATCATCTGGGTACT<br>GGCCGAAC   |
| G921AN<br>AP | TGATGTGGATTAGACAACATATAACTTTG<br>ATAGGTGTA  | TATATGTTGTCTAATCCACATCATCTGGGT<br>ACTGGCCG   |
| S932AN<br>AP | GTGTACCTTTTAGGGCAATGAGTCCAAG<br>CCCCTGTGCG  | ACTCATTGCCCTAAAAGGTACACCTATCA<br>AAGTTATAT   |
| L939AN<br>AP | GTCCAAGCCCTAGTGCGTGGAGCTGGAC<br>GCCAACAACC  | GCTCCACGCACTAGGGCTTGGACTCATTG<br>CCGCTAAAG   |
| D944AN<br>AP | CGTGGAGCTGTAGGCCAACAACCAGCCT<br>CGGTTTCCCG  | GGTTGTTGGCCTACAGCTCCACGCACAGG<br>GGCTTGGAC   |
| N947AN<br>AP | GGACGCCAACAACCAGCCTCGGTTTCCC<br>GAGTGGATCA  | ACCGAGGCTGCTAGTTGGCGTCCAGCTCC<br>ACGCACAGG   |
| P952AN<br>AP | GCCTCGGTTTTAGGAGTGGATCACCATCC<br>CCCTGGTGT  | TGATCCACTCCTAAAACCGAGGCTGGTTG<br>TTGGCGTCC   |
| W954AN<br>AP | GTTTCCCAGTAGATCACCATCCCCCTGG<br>TGTGCATCT   | GGATGGTGTACTACTCGGGAAACCGAGG<br>CTGGTTGTTG   |
| I955ANA<br>P | TCCCGAGTGGTAGACCATCCCCCTGGTGT<br>GCATCTACA  | GGGGGATGGTCTACCACTCGGGAAACCG<br>AGGCTGGTTG   |
| T956AN<br>AP | CGAGTGGATCTAGATCCCCCTGGTGTGC<br>ATCTACATGC  | CCAGGGGGATCTAGATCCACTCGGGAAA<br>CCGAGGCTGG   |
| I957ANA<br>P | GTGGATCACCTAGCCCCTGGTGTGCATCT<br>ACATGCTGA  | ACACCAGGGGCTAGGTGATCCACTCGGG<br>AAACCGAGGC   |
| P958AN<br>AP | GATCACCATCTAGCTGGTGTGCATCTACA<br>TGCTGAGCA  | TGCACACCAGCTAGATGGTGTACTCG<br>GGAAACCGA      |
| L959AN<br>AP | CACCATCCCCTAGGTGTGCATCTACATGC<br>TGAGCACAA  | AGATGCACACCTAGGGGATGGTGTATCCA<br>CTCGGGAAAC  |
| V960AN<br>AP | CATCCCCCTGTAGTGCATCTACATGCTGA<br>GCACAAACA  | TGTAGATGCACTACAGGGGGATGGTGTAT<br>CCTACTCGGGA |
| C961AN<br>AP | CCCCCTGGTGTAGATCTACATGCTGAGCA<br>CAAACATTT  | GCATGTAGATCTACACCAGGGGGATGGT<br>GATCCACTCG   |
| I962ANA<br>P | CCTGGTGTGCTAGTACATGCTGAGCACA<br>AACATTTTGC  | TCAGCATGTACTAGCACACCAGGGGGAT<br>GGTGTATCCAC  |
| Y963AN<br>AP | GGTGTGCATCTAGATGCTGAGCACAAAC<br>ATTTTGCTCG  | TGCTCAGCATCTAGATGCACACCAGGGG<br>GATGGTGTATC  |
| M964AN<br>AP | GTGCATCTACTAGCTGAGCACAAACATTT<br>TGCTCGTGA  | TTGTGCTCAGCTAGTAGATGCACACCAGG<br>GGGATGGTG   |

|               |                                            |                                                    |
|---------------|--------------------------------------------|----------------------------------------------------|
| L965AN<br>AP  | CATCTACATGTAGAGCACAAACATTTTGC<br>TCGTGAACT | TGTTTGTGCTCTACATGTAGATGCACACC<br>AGGGGGATG         |
| S966AN<br>AP  | CTACATGCTGTAGACAAACATTTTGCTCG<br>TGAACCTGC | AAATGTTTGTCTACAGCATGTAGATGCAC<br>ACCAGGGGG         |
| T967AN<br>AP  | CATGCTGAGCTAGAACATTTTGCTCGTGA<br>ACTTGCTGG | GCAAAATGTTCTAGCTCAGCATGTAGATG<br>CACACCAGG         |
| N968AN<br>AP  | GCTGAGCACATAGATTTTGCTCGTGA<br>TGCTGGTGG    | CGAGCAAAATCTATGTGCTCAGCATGTAG<br>ATGCACACC         |
| I969ANA<br>P  | GAGCACAACTAGTTGCTCGTGA<br>CTGGTGGCCA       | TCACGAGCAACTAGTTTGTGCTCAGCATG<br>TAGATGCAC         |
| Q992AN<br>AP  | GAACAACGATTAGGTGTGGAAGTTCCAG<br>CGGTACTTCC | ACTTCCACACCTAATCGTTGTTCTCCTGGA<br>CGCTGCCG         |
| W994AN<br>AP  | CGATCAGGTGTAGAAGTTCCAGCGGTAC<br>TTCCTGGTGC | GCTGGA<br>ACTTCTACACCTGATCGTTGTTCT<br>CCTGGACG     |
| K995AN<br>AP  | TCAGGTGTGGTAGTTCCAGCGGTACTTCC<br>TGGTGCAGG | ACCGCTGGA<br>ACTACCACACCTGATCGTTG<br>TTCTCCTGG     |
| Q997AN<br>AP  | GTGGAAGTTCTAGCGGTACTTCTGGTG<br>CAGGAGTACT  | GGAAGTACCGCTAGAACTTCCACACCTGA<br>TCGTTGTTT         |
| R998AN<br>AP  | GAAGTCCAGTAGTACTTCTGGTGCAG<br>GAGTACTGCA   | CCAGGAAGTACTACTGGA<br>ACTTCCACACC<br>TGATCGTTG     |
| Y999AN<br>AP  | GTTCCAGCGGTAGTTCTGGTGCAGGAG<br>TACTGCAGCA  | GCACCAGGA<br>ACTACCGCTGGA<br>ACTTCCAC<br>ACCTGATCG |
| Q1003A<br>NAP | CTTCTGGTGTAGGAGTACTGCAGCAGG<br>CTGACCATCC  | TGCAGTACTCCTACACCAGGAAGTACCGC<br>TGGA<br>ACTTCT    |
| E1004A<br>NAP | CCTGGTGCAGTAGTACTGCAGCAGGCTG<br>ACCATCCCCT | TGCTGCAGTACTACTGCACCAGGAAGTAC<br>CGCTGGAAC         |
| C1006A<br>NAP | GCAGGAGTACTAGAGCAGGCTGACCATC<br>CCCTTTCCAT | TCAGCCTGCTCTAGTACTCCTGCACCAGG<br>AAGTACCGC         |

## Supplementary Methods

### Commands in Rosetta to perform loop modeling:

```
/home/fanyang/rosetta/main/source/bin/loopmodel.linuxgccrelease \  
-in:path:database /home/fanyang/rosetta2015.25/main/database \  
-score:weights membrane_highres_Menv_smooth.wts \  
-in:file:fullatom \  
-membrane:normal_cycles 100 \  
-membrane:normal_mag 15 \  
-membrane:center_search \  
-ignore_unrecognized_res \  
-symmetry:symmetry_definition  
/home/fanyang/projects/input_files/3J5R_2017/4D_ABCD_r_4D_after_ccd_relaxed_r.symm \  
-symmetry:initialize_rigid_body_dofs \  
-in:file:spanfile /###.span \  
-in:file:s /###.pdb \  
-loops:loop_file /###.loop \  
-loops:remodel perturb_kic \  
-loops:refine refine_kic \  
-loops:relax no \  
-loops:strict_loops \  
-loops:build_attempts 20 \  
-relax:bb_move false \  
-max_inner_cycles 30 \  
-nstruct 51 \  
-out:prefix msymm-loop-kic- \  
-out:file:silent /###.silent \  

```

-out:file:silent\_struct\_type binary \

-mute all

## Commands in Rosetta to perform SASA calculation and filtering:

```
/home/fanyang/rosetta/main/source/bin/rosetta_scripts.linuxgccrelease \  
-database /home/fan/rosetta_2016.20/main/database  
-membrane:normal_cycles 100  
-membrane:normal_mag 15  
-membrane:center_search  
-in:file:spanfile /###.span  
-score:weights membrane_highres_Menv_smooth.wts  
-parser:protocol /###.xml  
-symmetry:symmetry_definition /###.symm  
-symmetry:initialize_rigid_body_dofs  
-ignore_unrecognized_res  
-in:file:silent_struct_type binary  
-in:file:silent /###.out  
-nstruct 1  
-out:file:silent /###.silent  
-out:file:silent_struct_type binary  
-overwrite
```

## Rosetta scripts to perform SASA calculation and filtering:

```
<ROSETTASCRIPITS>
  <RESIDUE_SELECTORS>
    <Not name="A875_unselected">
      <Index resnums=143/>
    </Not>
    <Not name="D920_unselected">
      <Index resnums=188/>
    </Not>
    <Not name="L939_unselected">
      <Index resnums=207/>
    </Not>
    <Not name="P958_unselected">
      <Index resnums=226/>
    </Not>
    <Not name="S966_unselected">
      <Index resnums=234/>
    </Not>
  </RESIDUE_SELECTORS>
  <TASKOPERATIONS>
    <OperateOnResidueSubset name="A875_only"
selector="A875_unselected" >
      <PreventRepackingRLT/>
    </OperateOnResidueSubset>
    <OperateOnResidueSubset name="D920_only"
selector="D920_unselected" >
      <PreventRepackingRLT/>
    </OperateOnResidueSubset>
    <OperateOnResidueSubset name="L939_only"
selector="L939_unselected" >
      <PreventRepackingRLT/>
    </OperateOnResidueSubset>
    <OperateOnResidueSubset name="P958_only"
selector="P958_unselected" >
      <PreventRepackingRLT/>
    </OperateOnResidueSubset>
    <OperateOnResidueSubset name="S966_only"
selector="S966_unselected" >
      <PreventRepackingRLT/>
    </OperateOnResidueSubset>
  </TASKOPERATIONS>
  <SCOREFXNS>
  </SCOREFXNS>
  <FILTERS>
    <TotalSasa name=D920_sasa threshold=10
task_operations=D920_only report_per_residue_sasa=1/>
    <TotalSasa name=L939_sasa threshold=10
task_operations=L939_only report_per_residue_sasa=1/>
    <TotalSasa name=P958_sasa threshold=10
task_operations=P958_only report_per_residue_sasa=1/>
```

```
    <TotalSasa name=S966_sasa threshold=30
task_operations=S966_only report_per_residue_sasa=1/>
    <TotalSasa name=A875_sasa threshold=48
task_operations=A875_only report_per_residue_sasa=1/>
</FILTERS>
  <MOVERS>
  </MOVERS>
  <PROTOCOLS>
    <Add filter=D920_sasa/>
    <Add filter=L939_sasa/>
    <Add filter=P958_sasa/>
    <Add filter=S966_sasa/>
    <Add filter=A875_sasa/>
  </PROTOCOLS>

</ROSETTASCRIPTS>
```
